# Supplementary material for: ATP-triggered highly sensitive probes for super-resolution mitochondrial imaging and low-dose bioimaging
Source: Royal Society of Chemistry journal article supplement (doi:10.1039/d3tb00534h), 2023-01-01
Supplement: d3tb00534h1.pdf [file d3tb00534h1.pdf]

# Electronic Supplementary Information (ESI)

## ATP-triggered highly sensitive probes for super-resolution image Mitochondria and Low-Dose bioimaging

Taihe Han<sup>a</sup>, Jinlong Zhang<sup>a</sup>, Shuai Mu<sup>b</sup>, Huihui Li<sup>c</sup>, Shuangtong Wu<sup>a</sup>, Xiaoyan Liu<sup>a</sup>,

Haixia Zhang<sup>\*a</sup>

<sup>a</sup> *State Key Laboratory of Applied Organic Chemistry, Key Laboratory of Nonferrous Metals Chemistry and Resources Utilization of Gansu Province and College of Chemistry and Chemical Engineering, Lanzhou University, Lanzhou 730000, China.*

<sup>b</sup> *State Key Laboratory of Veterinary Etiological Biology, College of Veterinary Medicine, Lanzhou University, Lanzhou 730000 (P. R. China).*

<sup>c</sup> *Key Laboratory of Advanced Materials of Tropical Island Resources, Ministry of Education, College of Science, Hainan University, Haikou 570228, China.*

### Contents:

|                                    |          |
|------------------------------------|----------|
| <b>1. Supplementary Data</b> ..... | <b>3</b> |
| <b>2. Table S1</b> .....           | <b>4</b> |
| <b>3. Reference</b> .....          | <b>5</b> |

## 1. Supplementary Data

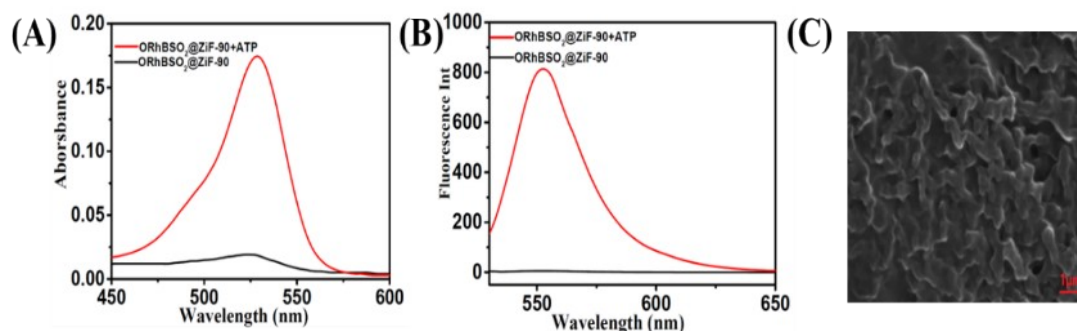

**Fig. S1** ORhBSO<sub>2</sub>@ ZIF-90 (A) Absorption spectra and (B) fluorescence spectra of the nanoprobe before and after reacting with ATP. (C) SEM image of nanocrystals treated with ATP (2.5 mM) for 3 min.

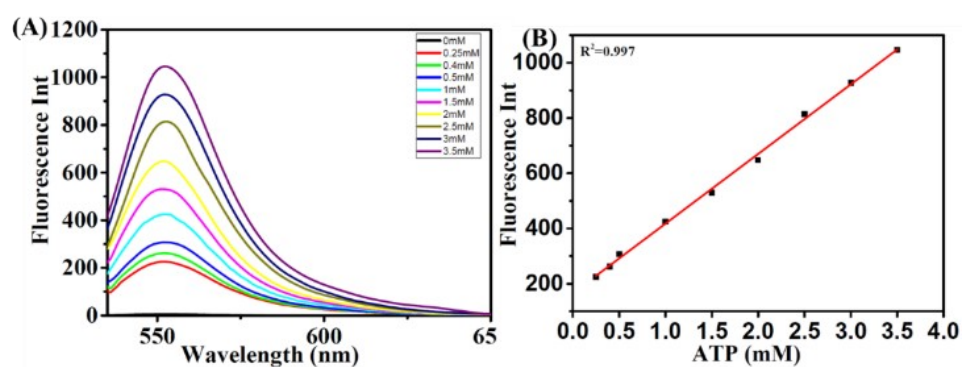

**Fig. S2** ORhBSO<sub>2</sub>@ ZIF-90 (A) Fluorescence spectra of the nanoprobe to ATP with increasing concentrations (0, 0.25, 0.4, 0.5, 1, 1.5, 2, 2.5, 3, and 3.5 mM).  $\lambda_{\text{exc}} = 530$  nm. (B) Linearity plot of the fluorescence intensity with ATP concentration.

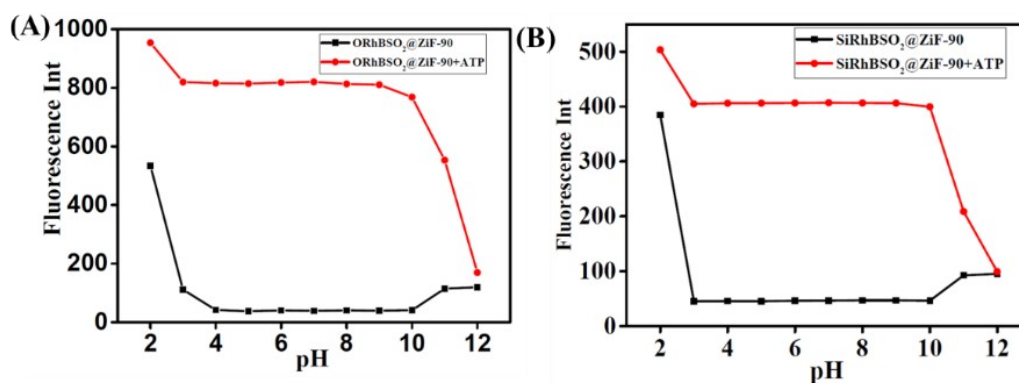

**Fig. S3** Influence of pH on the fluorescence response of probe in the presence and absence of ATP.

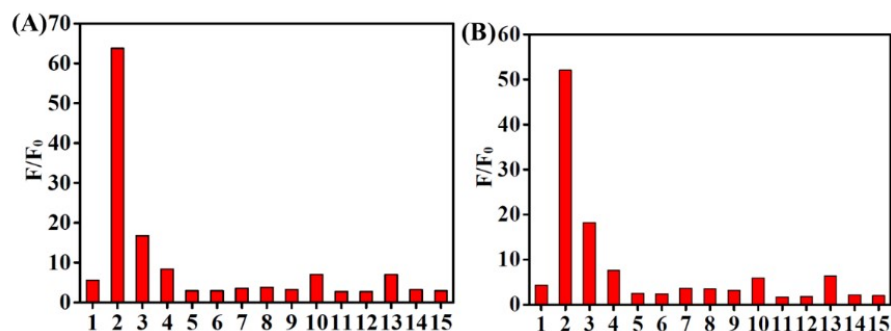

**Fig. S4** Tests of ATP selectivity by **SiRhBSO<sub>2</sub>@ZIF-90** (A) and **ORhBSO<sub>2</sub>@ZIF-90** (B) in the presence of various analytes at 37 °C. Analytes 1–15: Blank, ATP, ADP, AMP, H<sub>2</sub>PO<sub>4</sub><sup>-</sup>, P<sub>3</sub>O<sub>10</sub><sup>5-</sup>, P<sub>2</sub>O<sub>7</sub><sup>4-</sup>, CH<sub>3</sub>COO<sup>-</sup>, Na<sup>+</sup>, PO<sub>4</sub><sup>3-</sup>, K<sup>+</sup>, Zn<sup>2+</sup>, SO<sub>4</sub><sup>2-</sup>, Ca<sup>2+</sup>, Cl<sup>-</sup>.

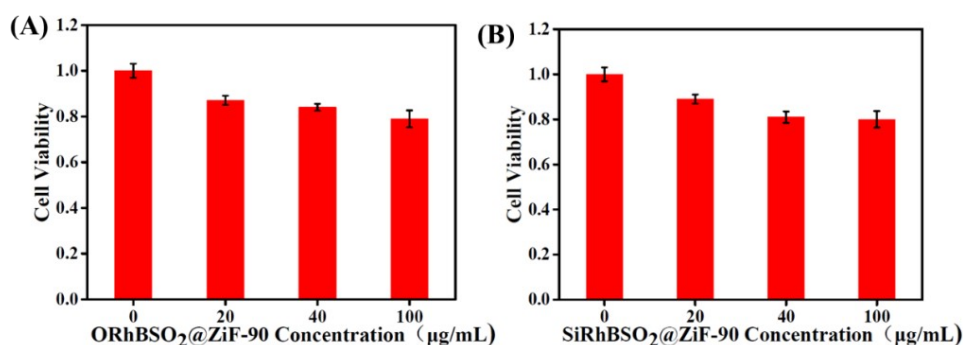

**Fig S5.** Percentage of viable HeLa cells after treatment with probe, respectively, at varied concentrations for 12 h, which is measured by CCK-8 assays.

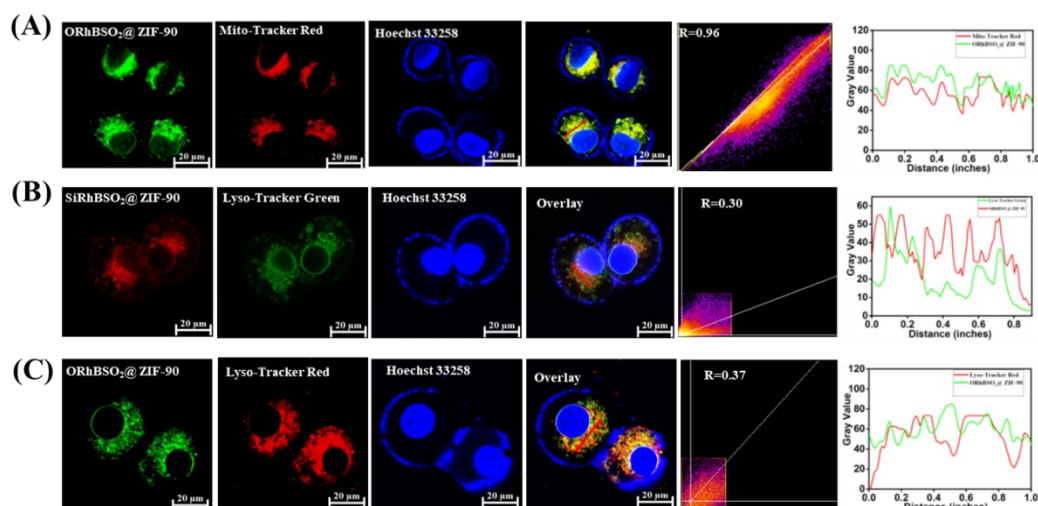

**Fig. S6** (A) Fluorescence images of HeLa cells contained with **ORhBSO<sub>2</sub>@ZIF-90** nanoprobe (10 µg/mL, 30 min) and Mito Tracker @Red (0.2 µM, 30 min) in HEPES at 37 °C. (B) Fluorescence images of HeLa cells contained with **SiRhBSO<sub>2</sub>@ZIF-90** nanoprobe (10 µg/mL, 30 min) and Lyso -Tracker (0.2 µM, 30 min) in HEPES at 37

°C.

(C) Fluorescence images of HeLa cells contained with ORhBSO<sub>2</sub>@ZIF-90 nanoprobe (10 µg/mL, 30 min) and Lyso -Tracker (0.2 µM, 30 min) in HEPES at 37 °C.

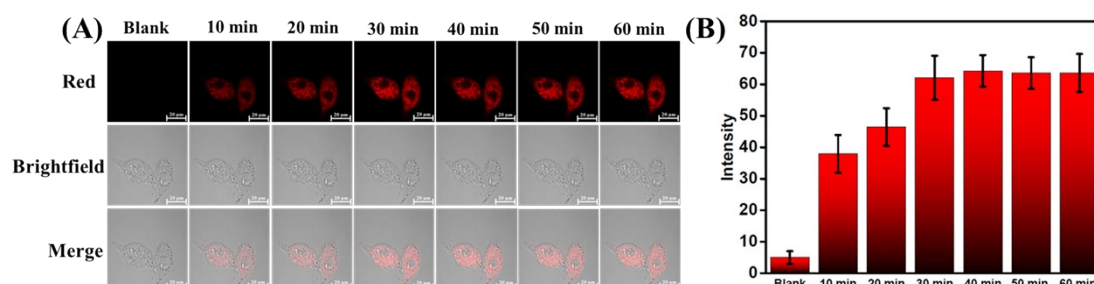

**Fig. S7** SiRhBSO<sub>2</sub>@ZIF-90 probe (10 µg/mL, 30 min) light stability was tested in living cells.

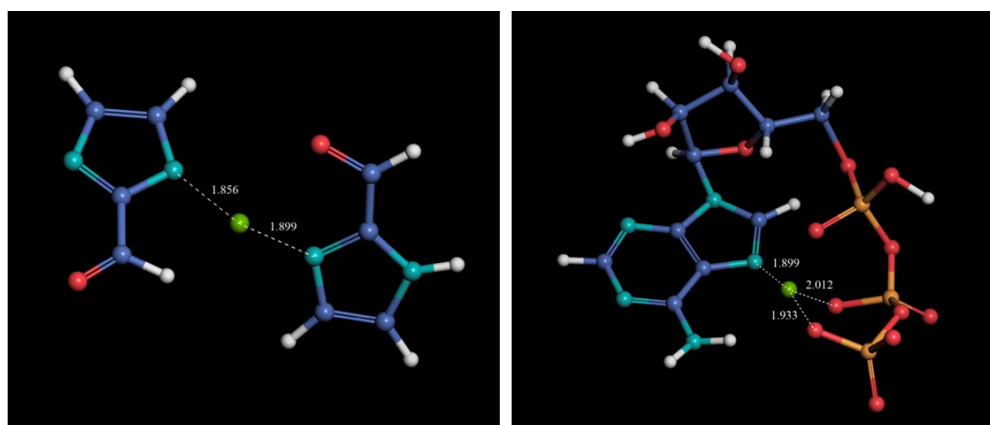

|                                                 | Zn <sup>2+</sup> | 2-ICA    | 2-ICA-Zn <sup>2+</sup> | ATP       | ATP-Zn <sup>2+</sup> |
|-------------------------------------------------|------------------|----------|------------------------|-----------|----------------------|
| E <sub>total</sub> (Hartree)                    | -1793.973        | -340.046 | -2474.088              | -2670.965 | -4464.995            |
| G <sub>total</sub> <sup>298.15</sup> (kcal/mol) | 0.000            | 30.652   | 64.526                 | 131.472   | 136.278              |
| G <sub>total</sub> <sup>298.15</sup> (Hartree)  | 0.000            | 0.049    | 0.103                  | 0.210     | 0.217                |
| E <sub>corr</sub> <sup>298.15</sup> (Hartree)   | -1793.973        | -339.997 | -2473.986              | -2670.756 | -4464.777            |
| 单位                                              | Hartree          | kcal/mol |                        | kJ/mol    |                      |
| E <sub>binding</sub> (2-ICA-Zn <sup>2+</sup> )  | -0.018692        | -11.730  |                        | -49.100   |                      |
| E <sub>binding</sub> (ATP-Zn <sup>2+</sup> )    | -0.048449        | -30.402  |                        | -127.263  |                      |

**Fig. S8** DFT theoretical calculation results

**2.Table S1.****Comparison of the performance of this work with the ATP probes reported.**

| <b>Nanoprobe</b>              | <b><math>\lambda_{ex}</math><br/>(nm)</b> | <b><math>\lambda_{em}</math><br/>(nm)</b> | <b>Linear<br/>Range(mM)</b> | <b><math>\Phi</math></b> | <b>LOD<br/>(<math>\mu</math>M)</b> | <b>Cell imaging<br/>dose (<math>\mu</math>g/mL)</b> | <b>Ref.</b> |
|-------------------------------|-------------------------------------------|-------------------------------------------|-----------------------------|--------------------------|------------------------------------|-----------------------------------------------------|-------------|
| RhB@ZIF-8                     | 546                                       | 585                                       | 0.2–2                       | 0.31                     | 35                                 | 20                                                  | [1]         |
| RhB/ZIF-90                    | 545                                       | 585                                       | 0.25–2.4                    | 0.31                     | 30                                 | 100                                                 | [2]         |
| CP@ZIF-90                     | 650                                       | 705                                       | 1–10                        | 0.36                     | 37                                 | 4000                                                | [3]         |
| CPQ@ZIF-90                    | 650                                       | 740                                       | 1–10                        | 0.18                     | 40                                 | 4000                                                | [4]         |
| NIR@ZIF-90                    | 690                                       | 750                                       | 0.1–5                       | 0.18                     | 56                                 | 4000                                                | [5]         |
| CuNCs/ZIF@P1-P2               | 480                                       | 516                                       | 0.25–4                      | no                       | 83                                 | 60                                                  | [6]         |
| ZIF-90@SiR                    | 640                                       | 670                                       | 1–7                         | 0.21                     | 60                                 | 4000                                                | [7]         |
| ATP-Red-1                     | 566                                       | 585                                       | 0.5–10                      | 0.37                     | 32                                 | 8.89                                                | [8]         |
| RhB-probe-1                   | 585                                       | 634                                       | 0.05–0.9                    | 0.31                     | 30                                 | 37.73                                               | [9]         |
| Bio-siR                       | 640                                       | 675                                       | 0.1–10                      | 0.21                     | 33.3                               | 13.5                                                | [10]        |
| Probe-1                       | 650                                       | 740                                       | 1–10                        | 0.18                     | 40                                 | 14.96                                               | [11]        |
| ORhBSO <sub>2</sub> @ZIF-90   | 524                                       | 555                                       | 0.1–3.5                     | 0.99                     | 6.6                                | 10                                                  | This        |
| SiRhBSO <sub>2</sub> @ ZIF-90 | 630                                       | 653                                       | 0.1–3.5                     | 0.66                     | 7.56                               | 10                                                  | This        |

### 3. Reference

- [1] K. Wang, M.P. Qian, H.L. Qi, Q. Gao, C.X. Zhang, *Nanoscale* 12 (2020) 15663–15669.
- [2] J Deng, K Wang, M Wang, P Yu and L Mao, *J. Am. Chem. Soc.* 2017, 139, 16, 5877–5882.
- [3] M J Hou, J T Chen , W L Jiang, G F Zeng , J Zhan , G J Mao , C Y Li , *Sensor Actuat B-Chem* 2022, 369,15 ,132286.
- [4] M J Hou, Z Q Wang, J T Chen, Z K Tan, G J Mao, J Fei, and C Y Li, *Anal. Chem.* 2022, 94, 41, 14257–14264.
- [5] Y T Zhao, X X Chen, W L Jiang, Y Li, J Fei, and C Y Li, *Appl. Mater. Interfaces* 2020, 12, 47840–47847.
- [6] X Shi, L Ji, Y Hu , J Gu , L Wang , W Lu , J Meng , Y Du , L Huang ,D Nie ,Y Yu, *Sensor Actuat B-Chem* ,2022, 363,15 131848.
- [7] J T Chen, S S Chen, Z Q Wang, G Yu, G J Mao, J Fei, and C Y Li, *Anal. Chem.* 2023, 95, 3, 2119–2127.
- [8] L Wang, L Yuan, X Zeng, J Peng, Y Ni, J Er, W Xu, B Agrawalla, D Su, B Kim ,Y Chang *Angew. Chem. Int. Ed.* 2016, 55, 1773 - 1776.
- [9] A Florence T Ku, G Kim, A Nasirian, J Ko, J Yoon, J Kim, *Sensors and Actuators B:2019*, 292, 40–47.
- [10] W Jiang, W Wang, Z Wang, M Tan, G Mao, Y Li, C Li, *Analytica Chimica Acta*, 2022,1206, 339798.
- [11] K Swamy, S Eom, Y Liu, G Kim, D Lee, J Yoon, *Sensors and Actuators B: 2019*, 281, 350–358.
